# Supplementary material for: Loneliness among parents during the perinatal and early parenting periods: a cross-sectional study in Australia
Source: Research Square preprint supplement (doi:10.21203/rs.3.rs-7017365/v1), 2025-08-06
Supplement: Supplementary file 1 [file d533c5078d7c87483d30c745.docx]

**Survey on Loneliness Among Australian Parents in the Perinatal and Early Parenting Periods**

Screening Question

Are you currently expecting a child (either pregnant or the partner of a pregnant person) and/or or do you have a child who is four years old or younger?

*(If no, terminate)*

**Section 1: Demographics**

*We would like to start by asking some questions about you.*

| D2. Are you currently pregnant, or the partner of a pregnant person? | 0 = Yes, pregnant  1 = Yes, the partner of a pregnant person  2 = No |  |
| --- | --- | --- |
| *Ask if D2=2 OR D4 = 1 OR 2*  D1. Are you a parent or caregiver to a child/children? | 0 = No  1 = Yes with at least one child under 1 year old  2 = Yes, with all children between 1 and 4 years of age  3 = Yes, with all children over 4 years of age | D1a. *If 1 or 2 or 3 selected. How old is your youngest child? [open number field]* |
| *Ask if D1=1,2 or 3*  D3. Were you the person who carried and gave birth to your child/ children? | 0= Yes  1= No  2 = Prefer not to answer |  |
| D4. What is your age (please enter number of years) | *[open number field]* |  |
| D5. What is your postcode? | *[open number field]* |  |

**Section 2: Measuring Loneliness and Psychosocial Factors**

*In the next questions we will be asking about your recent experiences including how you feel, there are no right or wrong answers.*

2.1 Indicate how often each of the statements below is descriptive of you.

|  | Never | Rarely | Sometimes | Always |
| --- | --- | --- | --- | --- |
| How often do you feel that you are "in tune" with the people around you? | 1 | 2 | 3 | 4 |
| How often do you feel that you lack companionship? | 1 | 2 | 3 | 4 |
| How often do you feel that there is no one you can turn to? | 1 | 2 | 3 | 4 |
| How often do you feel alone? | 1 | 2 | 3 | 4 |
| How often do you feel part of a group of friends? | 1 | 2 | 3 | 4 |
| How often do you feel that you have a lot in common with the people around you? | 1 | 2 | 3 | 4 |
| How often do you feel that you are no longer close to anyone? | 1 | 2 | 3 | 4 |
| How often do you feel that your interests and ideas are not shared by those around you? | 1 | 2 | 3 | 4 |
| How often do you feel outgoing and friendly? | 1 | 2 | 3 | 4 |
| How often do you feel close to people? | 1 | 2 | 3 | 4 |
| How often do you feel left out? | 1 | 2 | 3 | 4 |
| How often do you feel that your relationships with others are not meaningful? | 1 | 2 | 3 | 4 |
| How often do you feel that no one really knows you well? | 1 | 2 | 3 | 4 |
| How often do you feel isolated from others? | 1 | 2 | 3 | 4 |
| How often do you feel you can find companionship when you want it? | 1 | 2 | 3 | 4 |
| How often do you feel that there are people who really understand you? | 1 | 2 | 3 | 4 |
| How often do you feel shy? | 1 | 2 | 3 | 4 |
| How often do you feel that people are around you but not with you? | 1 | 2 | 3 | 4 |
| How often do you feel that there are people you can talk to? | 1 | 2 | 3 | 4 |
| How often do you feel that there are people you can turn to? | 1 | 2 | 3 | 4 |

2.2 How often do you feel lonely?

a) Often/ Always

b) Some of the time

c) Occasionally

d) Hardly Ever

e) Never

2.3 Please rate your agreement with the following statements:

|  | Strongly disagree | Disagree | Neither agree nor disagree | Agree | Strongly agree |
| --- | --- | --- | --- | --- | --- |
| People often feel ashamed or embarrassed to tell others if they are feeling lonely |  |  |  |  |  |
| I would feel embarrassed or ashamed to tell others I was feeling lonely |  |  |  |  |  |
| I am satisfied with the level of social connection I have |  |  |  |  |  |
| There are barriers for me to be able to engage with friends, family and neighbours |  |  |  |  |  |
| I have a supportive partner |  |  |  |  |  |

**Section 3: Perinatal Mental Health Screening**

Please read each statement and select 0, 1, 2 or 3 which indicates how much the statement applied to you over the past week. There are no right or wrong answers. Do not spend too much time on any statement. The rating scale is as follows: 0 Did not apply to me at all - NEVER 1 Applied to me to some degree, or some of the time - SOMETIMES 2 Applied to me to a considerable degree, or a good part of time - OFTEN 3 Applied to me very much, or most of the time - ALMOST ALWAYS

|  | 0 Never | 1 Sometimes | 2 Often | 3 Almost always |
| --- | --- | --- | --- | --- |
| I found it hard to wind down |  |  |  |  |
| I was aware of dryness of my mouth |  |  |  |  |
| I couldn’t seem to experience any positive feeling at all |  |  |  |  |
| I experienced breathing difficulty (e.g., excessively rapid breathing, breathlessness in the absence of physical exertion) |  |  |  |  |
| I found it difficult to work up the initiative to do things |  |  |  |  |
| I tended to over-react to situations |  |  |  |  |
| I experienced trembling (e.g., in the hands) |  |  |  |  |
| I felt that I was using a lot of nervous energy |  |  |  |  |
| I was worried about situations in which I might panic and make a fool of myself |  |  |  |  |
| I felt that I had nothing to look forward to |  |  |  |  |
| I found myself getting agitated |  |  |  |  |
| I found it difficult to relax |  |  |  |  |
| I felt down-hearted and blue |  |  |  |  |
| I was intolerant of anything that kept me from getting on with what I was doing |  |  |  |  |
| I felt I was close to panic |  |  |  |  |
| I was unable to become enthusiastic about anything |  |  |  |  |
| I felt I wasn’t worth much as a person |  |  |  |  |
| I felt that I was rather touchy |  |  |  |  |
| I was aware of the action of my heart in the absence of physical exertion (e.g, sense of heart rate increase, heart missing a beat) |  |  |  |  |
| I felt scared without any good reason |  |  |  |  |
| I felt that life was meaningless |  |  |  |  |

**Section 4: Additional Demographics**

*Finally, we would like to ask you some more demographic questions, this will help us to make sure we have responses from a diverse group of people.*

| - 1. What sex were you assigned at birth? | 0 = Female  1 = Male  2 = Another term, please specify:  3 = Prefer not to answer | *If 2 selected:* [open-text box] |
| --- | --- | --- |
| - 1. How would you describe your sexual orientation (select all that apply)? | 0 = Heterosexual or straight  1 = Gay  2 = Lesbian  3 = Bisexual  4 = Queer  5 = Pansexual  6 = Asexual  7 = Prefer not to label  8 = Other, please describe  9 = Unsure  10 = Prefer not to say | *If 8 selected:* [open-text box] |
| 5.3 What is your current relationship status? (Select the option that best describes your current circumstances) | 0 = Single  1 = In a relationship (living together)  2 = In a relationship (not living together)  3 = Other, please describe  4 = Prefer not to say |  |
| 5.4 What is the highest level of education that you have completed? | 0 = Never attended school  1 = Primary school  2 = High school (Year 10)  3 = High school (Year 12)  4 = Trade certificate or diploma  5 = Undergraduate degree  6 = Postgraduate degree  7 = Other, please describe  8 = Prefer not to answer | *If 7 selected:* [open-text box] |
| 5.5 What is your current employment situation? Select the option that best describes your current circumstances. | 0 = Employed full time  1 = Employed on a part-time or casual basis  2 = Full time caring duties (including parenting)  3 = Unemployed  4 = Studying  5 = Volunteering  6 = Retired  7 = Other, please describe  8 = Prefer not to answer | *If 0 or 1 selected.*  What is your work arrangement?  0 = Work from home  1 = Work from an office/ in-person  2 = Hybrid (both work from home and in an office)  *If 7 selected:* [open-text box] |
| 5.6In which country were you born? | 0 = Australia  1 = England  2 = New Zealand  3 = India  4 = Italy  5 = Vietnam  6 = Philippines  7 = China  8 = Māori  9 = Other, please describe  10 = Prefer not to answer | *If 9 selected:* [open-text box] |
| 5.7 What is the main language that you speak at home? | 0 = English  1 = Other, please describe  2 = Prefer not to answer | *If 1 selected:* [open-text box] |
| 5.8 How would you describe your economic situation? | 1 = I really can’t make ends meet  2 = I just about get by with the income I have now  3 = I have enough to get along and even a little extra  4 = I can buy pretty much anything I want with the money I have |  |
| 5.9 What is your total household income? Please select your total take home income (after tax) including any parental leave payments. | 1= $0 to $19,999  2 = $20,000-$49,999  3 = $50,000-$89,999  4 = $90,000-$129,999  5 = $130,000-$149,000  6 = $150,000+  7 = Prefer not to answer |  |

Section 6: End of Survey

Thank you for your time and participation in our research.

By participating, you have contributed to helping researchers from Friends for Good to better understand loneliness in Australia. This will allow us to help raise awareness about loneliness and learn how to better support individuals who are experiencing loneliness, particularly in the perinatal period and early parenthood.
